# Supplementary material for: Newborn Screening for Cystic Fibrosis: Infant and Laboratory Factors Affecting Successful Sweat Test Completion
Source: PubMed Central journal article supplement (PMC7838990; doi:10.3390/ijns7010001), 2020-12-25
Supplement: IJNS-07-00001-s001.pdf [file IJNS-07-00001-s001.pdf]

Department of Pathology/Clinical Laboratory  
1600 Rockland Rd  
Wilmington DE 19899

## **2020 SWEAT TEST COLLECTION TRAINING/ASSESSMENT**

POSITION: PHLEBOTOMIST    NAME: \_\_\_\_\_    DATE: \_\_\_\_\_

OBSERVER: \_\_\_\_\_

**SWEAT TESTING:** Successful completion of Sweat test training/assessment. It is required for sign off on phlebotomy training for sweat test procedure. For each category indicated, the phlebotomist must demonstrate acceptable performance by random monthly observation/s.

**Random Assessments/Observations-** one per month (video viewed once annually or if education recommended or desired)  
**Annual Comp Assessments/Observations-** for each associate that performs sweat testing –video is mandatory

**RANDOM MONTHLY ASSESSMENT**                       **VIDEO**    **N/A**  **Y**

LINK TO MACRODUCT Sweat Test Collection Video = [Wescor Macroduct Usage](#)

### **INSTRUMENTATION**

**Check Box When Performed**

### **SWEAT TEST PROCEDURE**

#### **Patient Testing Check Off**

- CLEAN/PREP SITE
- ELECTRODE STIMULATION WITH PILOCARPINE
- MICRODUCT COLLECTION DEVICE PLACEMENT
- MICRODUCT COLLECTION AFTER 30 MINUTES
- MICRODUCT SWEAT LABELING
- MACRODUCT VIDEO VIEWED (link provided)

### **DATE AND INITIAL AT COMPLETION OF ASSESSMENT**

Collector Initial: \_\_\_\_\_ Date: \_\_\_\_\_      Observer Initial: \_\_\_\_\_ Date: \_\_\_\_\_

Supervisor Initial: \_\_\_\_\_ Date: \_\_\_\_\_
